# Supplementary material for: Antitumor activity of a novel anti-vascular endothelial growth factor receptor-1 monoclonal antibody that does not interfere with ligand binding
Source: PubMed Central journal article supplement (PMC5341950; doi:10.18632/oncotarget.12108), 2016-09-19
Supplement: oncotarget-07-72868-s001.pdf [file oncotarget-07-72868-s001.pdf]

# Antitumor activity of a novel anti-vascular endothelial growth factor receptor-1 monoclonal antibody that does not interfere with ligand binding

## Supplementary Materials

### SUPPLEMENTARY MATERIALS AND METHODS

#### Western blot analysis

Samples (VEGFR-1/Fc or VEGFR-2/Fc chimeras) were run in 10% SDS-polyacrylamide gels and proteins transferred to supported nitrocellulose membranes for Western blotting analysis using the following primary antibodies at 1 µg/ml: anti-VEGFR-1 (AF321, R&D) and anti-VEGFR-2 (AF357, R&D) polyclonal Abs or D16F7 mAb. Anti-mouse or anti-rabbit Ig/Horseradish peroxidase secondary antibodies and ECL Western blotting detection reagents (GE Healthcare, Milan, Italy), were used to identify the proteins of interest.

#### Cell proliferation assay

Cell proliferation was evaluated in 96-well plates using the tetrazolium compound MTS [3-(4,5-dimethylthiazol-2-yl)-5-(3-carboxymethoxyphenyl) 2-(4-sulphophenyl)-2H-tetrazolium, inner salt] from Promega (Madison, WI), as previously described [47]. Graded amounts of cells suspended in complete medium containing 5 µg/ml of D16F7 or control antibody or without antibodies were dispensed into flat-bottom 96-well plates and grown at 37°C in a 5% CO<sub>2</sub> humidified atmosphere. Six replica wells were used for every condition. After 3-5 days, 20 µl of MTS solution were added to each well and cells were incubated at 37°C for 2 h. Absorbance was read at 490 nm (reference wavelength 655 nm) using a 3550-UV microplate reader.

#### Apoptosis analysis by flow cytometry

For apoptosis analysis after treatment of B16F10 cells with D16F7 mAb, cells were seeded in 6-well plates ( $2.5 \times 10^5$  cell/well) and, after 24 h, left untreated or treated with 5 µg/ml of D16F7 or control mouse IgG mAb at 37°C for 48 and 72 h. Cells were then harvested, washed with PBS and fixed in 70% ethanol at -20°C for 18 h. After centrifugation, cells were resuspended in 1 ml of hypotonic solution containing 50 µg/ml propidium iodide (Sigma-Aldrich), 0.1% sodium citrate, 0.1% Triton-X, and 10 µg/ml RNase (Roche), and incubated at 37°C in the dark for 15 min. The propidium iodide fluorescence was measured on a linear scale using a FACSScan flow cytometer (Becton Dickinson, Franklin Lakes, NJ) to detect the hypodiploid peak characteristic of apoptotic cells.

#### Cell adhesion to ECM components

Cell adhesion was tested on 96-well plates previously coated with commercial basement membrane matrix matrigel (20 µg/ml; BD Biosciences), collagen I (10 µg/ml, Roche), fibronectin (10 µg/ml, Sigma-Aldrich), gelatin (5 µg/ml, Sigma-Aldrich) and blocked with 3% BSA in PBS. Cells were seeded into wells ( $4 \times 10^4$  cells/well) and incubated at 37°C for 40 min. Non-adherent cells were washed out and attached cells fixed in ethanol for 5 min and stained with 0.5% crystal violet. Adhesion efficiency was determined by quantitative dye extraction with 10% acetic acid and spectrophotometric measurement of absorbance at 595 nm in a Microplate reader 3550-UV.

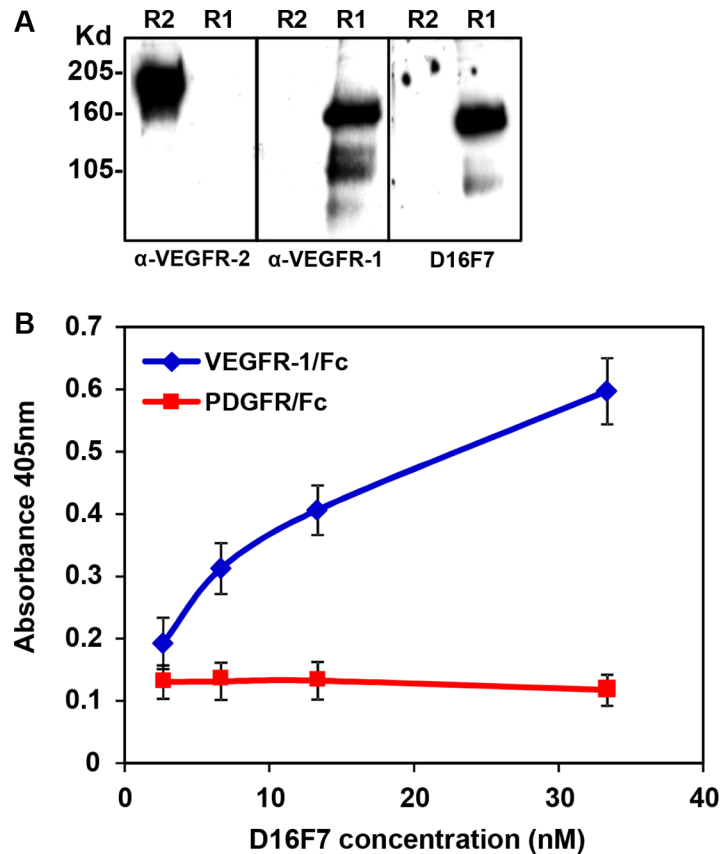

**Supplementary Figure S1: Characterization of anti-VEGFR-1 D17F7 mAb.** (A) D16F7 mAb specifically recognizes VEGFR-1 in immunoblot analysis. VEGFR-1/Fc (R1) or VEGFR-2/Fc (R2) chimeras were loaded on 10% polyacrylamide gels and anti-VEGFR-1 or anti-VEGFR-2 polyclonal Abs or D16F7 mAb were used for immunodetection. (B) D16F7 mAb specifically binds VEGFR-1 in a concentration-dependent manner. Titration of purified D16F7 mAb was performed by ELISA, using plates coated with VEGFR-1/Fc or PDGFR $\alpha$ /Fc chimeras (negative control). D16F7 mAb binding was assessed using alkaline phosphatase-conjugated anti-mouse antibody. Results are expressed as arithmetic mean  $\pm$  SD of absorbance at 405 nm after subtraction of background absorbance measured in BSA coated wells. The experiment shown is representative of three independent determinations with similar results.

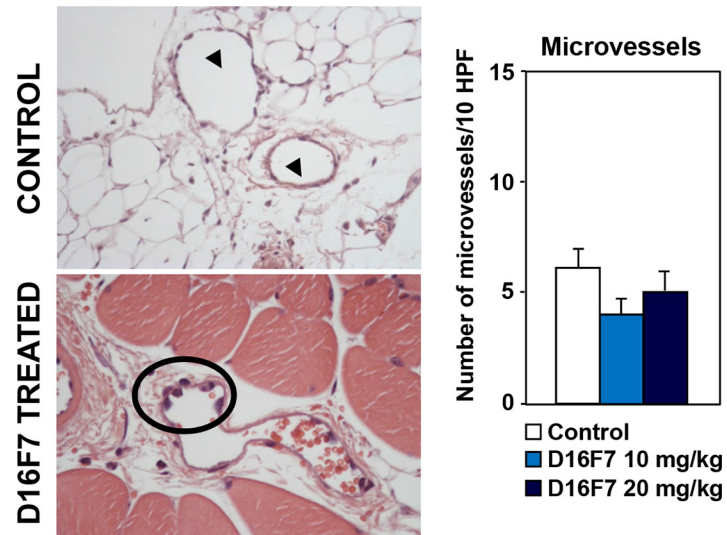

**Supplementary Figure S2: Characterization of vasculature structures in melanoma specimens obtained from control or D16F7 mAb treated mice.** In control mice, vascular structures are lined by normal endothelial cells in the tissue surrounding the tumor mass (arrow heads). In treated mice (10 mg/kg) extra-tumoral vessels are lined by reactive endothelium (circle). Original magnification, 4x. Histograms represent the number of microvessels/10 HPF  $\pm$  SD.
